1 **TITLE:**

2 Whole-cell cryo-electron tomography of cultured and primary eukaryotic cells on  
3 micropatterned TEM grids  
4

5 **AUTHORS AND AFFILIATIONS:**

6 Bryan S. Sibert<sup>1,2,3,\*</sup>, Joseph Y. Kim<sup>1,4,\*</sup>, Jie E. Yang<sup>1,2,3</sup>, Elizabeth R. Wright<sup>1,2,3,5</sup>

7 <sup>1</sup>Department of Biochemistry, University of Wisconsin, Madison, WI USA

8 <sup>2</sup>Cryo-Electron Microscopy Research Center, Department of Biochemistry, University of  
9 Wisconsin, Madison, WI USA

10 <sup>3</sup>Midwest Center for Cryo-Electron Tomography, Department of Biochemistry, University of  
11 Wisconsin, Madison, WI USA

12 <sup>4</sup>Department of Chemistry, University of Wisconsin, Madison, WI USA

13 <sup>5</sup>Morgridge Institute for Research, Madison, WI, USA

14 \*These authors contributed equally to this work.  
15

16 Corresponding author:

17 Elizabeth R. Wright

18 [erwright2@wisc.edu](mailto:erwright2@wisc.edu)

19 (608) 265-0666  
20

21 Email addresses of coauthors:

22 Bryan S. Sibert ([sibert@wisc.edu](mailto:sibert@wisc.edu))

23 Joseph Y. Kim ([jykim35@wisc.edu](mailto:jykim35@wisc.edu))

24 Jie E. Yang ([jyang525@wisc.edu](mailto:jyang525@wisc.edu))  
25

26 **KEYWORDS:**

27 Cell culture, correlative light and electron microscopy (CLEM), cryo-electron microscopy (cryo-  
28 EM), cryo-electron tomography (cryo-ET), fluorescence light microscopy (fLM), maskless  
29 photopatterning, micropatterning, neurons, respiratory syncytial virus (RSV)  
30

31 **ABSTRACT**

32 Whole-cell cryo-electron tomography (cryo-ET) is a powerful technique that can provide  
33 nanometer-level resolution of biological structures within the cellular context and in a near-  
34 native frozen-hydrated state. It remains a challenge to culture or adhere cells on TEM grids in a  
35 manner that is suitable for tomography while preserving the physiological state of the cells.  
36 Here, we demonstrate the versatility of micropatterning to direct and promote growth of both  
37 cultured and primary eukaryotic cells on TEM grids. We show that micropatterning is  
38 compatible with and can be used to enhance studies of host-pathogen interactions using  
39 respiratory syncytial virus infected BEAS-2B cells as an example. We demonstrate the ability to  
40 use whole-cell tomography of primary *Drosophila* neuronal cells to identify organelles and  
41 cytoskeletal structures in cellular axons and the potential for micropatterning to dramatically  
42 increase throughput for these studies. During micropatterning, cell growth is targeted by  
43 depositing extra-cellular matrix (ECM) proteins within specified patterns and positions on the  
44 foil of the TEM grid while the other areas remain coated with an anti-fouling layer. Flexibility in

45 the choice of surface coating and pattern design make micropatterning broadly applicable for a  
46 wide range of cell types. Micropatterning is useful for studies of structures within individual  
47 cells as well as more complex experimental systems such as host-pathogen interactions or  
48 differentiated multi-cellular communities. Micropatterning may also be integrated into many  
49 downstream whole-cell cryo-ET workflows including correlative light and electron microscopy  
50 (cryo-CLEM) and focused-ion beam milling (FIB-SEM).

51

## 52 **INTRODUCTION:**

53 With the development, expansion, and versatility of cryo-electron microscopy (cryo-EM),  
54 researchers have examined a wide-range of biological samples in a near-native state from  
55 macromolecular (~1 nm) to high (~2 Å) resolution. Single-particle cryo-EM and electron  
56 diffraction techniques are best applied to purified macromolecules in solution or in a crystalline  
57 state, respectively <sup>1,2</sup>. Whereas, cryo-electron tomography (cryo-ET) is uniquely suited for near-  
58 native structural and ultrastructural studies of large, heterologous objects such as bacteria,  
59 pleomorphic viruses, and eukaryotic cells <sup>3</sup>. In cryo-ET, three-dimensional (3D) information is  
60 obtained by physically tilting the sample on the microscope stage and acquiring a series of  
61 images through the sample at different angles. These images, or tilt-series, often cover a range  
62 of +60/-60 degrees in one to three degree increments. The tilt-series can then be  
63 computationally reconstructed into a 3D volume, also known as a tomogram <sup>4</sup>.

64

65 All cryo-EM techniques require the sample to be embedded in a thin layer of amorphous, non-  
66 crystalline, vitreous ice. One of the most commonly used cryo-fixation techniques is plunge  
67 freezing, where the sample is applied to the EM grid, blotted, and rapidly plunged into liquid  
68 ethane or a mixture of liquid ethane and propane. This technique is sufficient for the  
69 vitrification of samples from <100 nm to ~10 µm in thickness including cultured human cells,  
70 such as HeLa cells <sup>5,6</sup>. Thicker samples, such as mini-organoids or tissue biopsies, up to 200 µm  
71 in thickness, can be vitrified by high-pressure freezing <sup>7</sup>. However, due to increased electron  
72 scattering of thicker samples, sample and ice thickness for cryo-ET is limited to ~0.5 – 1 µm in  
73 300 kV transmission electron microscopes. Therefore, whole-cell cryo-ET of many eukaryotic  
74 cells is limited to the cell periphery or extensions of cells unless additional sample preparation  
75 steps are used such as cryo-sectioning <sup>8</sup> or focused-ion beam milling <sup>9-11</sup>.

76

77 A limitation of many whole-cell cryo-ET imaging experiments is data collection throughput <sup>12</sup>.  
78 Unlike single particle cryo-EM, where thousands of isolated particles can often be imaged from  
79 a single TEM grid square, cells are large, spread-out, and must be grown at low enough density  
80 to allow for the cells to be preserved in a thin layer of vitreous ice. Often the region of interest  
81 is limited to a particular feature or sub-area of the cell. Further limiting throughout is the  
82 propensity of cells to grow on areas that are not amenable for TEM imaging, such as on or near  
83 TEM grid bars. Due to unpredictable factors associated with cell culture on TEM grids,  
84 technological developments are needed to improve sample accessibility and throughput for  
85 data acquisition.

86

87 Substrate micropatterning with adherent extra-cellular matrix (ECM) proteins is a well-  
88 established technique to direct the growth of cells on glass and other tissue culture substrates

89 <sup>13</sup>. Such techniques have not only allowed for the precise positioning of cells, they have also  
90 supported the creation of multicellular networks, such as patterned neural cell circuits <sup>14</sup>.  
91 Bringing micropatterning to cryo-ET will not only increase throughput, but it can also open up  
92 new studies for exploring complex and dynamic cellular microenvironments.

93

94 Recently, we and others have begun using micropatterning techniques on TEM grids through  
95 multiple approaches <sup>15-17</sup>. Here, we describe the use of a maskless photopatterning technique  
96 for TEM grids using the Alvéole PRIMO system. With the PRIMO process, an antifouling layer is  
97 applied on top of the substrate, followed by application of a photocatalyst and ablation of the  
98 antifouling layer in user-defined patterns with a UV laser. ECM proteins can then be added to  
99 the patterns for the appropriate cell culture. This method has been used by several groups for  
100 cryo-ET studies of RPE1, MDCKII, HFF, and endothelial cell lines <sup>15-17</sup>. The PRIMO system is  
101 compatible with multiple anti-fouling layer substrates as well as either a liquid or gel  
102 photocatalyst reagent. A variety of ECM proteins can be selected from and adapted for the  
103 specificity of the cell line, conferring versatility for the user.

104

105 We have successfully applied micropatterning to a number of projects within the lab. Here we  
106 present results from our use of micropatterning for cryo-ET studies of cultured HeLa cells,  
107 respiratory syncytial virus (RSV)-infected BEAS-2B cells, and primary larval *Drosophila*  
108 *melanogaster* neurons <sup>18</sup>. Significant findings include the identification of ECM proteins,  
109 patterns, and other technological adaptations to allow for the micropatterning of the fragile  
110 primary *Drosophila melanogaster* neurons. This is a valuable model system for a number of  
111 reasons, including the ability to perform whole-cell tomography on neuronal extensions  
112 without the need for downstream thinning techniques post-vitrification. We also show that  
113 micropatterning can be applied to virus infected cells which remain competent for viral release  
114 after targeted growth in micropatterned regions. Further, released virions remain in proximity  
115 to infected cells in areas suitable for cryo-ET.

116

## 117 **RESULTS:**

118 This procedure was used to pattern EM grids for whole cell cryo-ET experiments. The entire  
119 workflow presented in this study, including initial cell culture preparations, micropatterning (Fig  
120 1 and Fig 2), and LM and cryo-EM imaging encompasses 3-7 days. In our protocol we use a two-  
121 step procedure to generate the anti-fouling layer by applying PLL to the grid and subsequently  
122 linking PEG by addition of the reactive PEG-SVA. The anti-fouling layer can also be applied in a  
123 single step by adding PLL-g-PEG in one incubation. We used the PLPP gel as a catalyst for the UV  
124 micropatterning, the catalyst is also available as a less concentrated liquid. The gel allows for  
125 patterning at a significantly reduced dose compared to the liquid, which results in much faster  
126 patterning. With our system, the actual patterning time of a full TEM grid was ~2 minutes. The  
127 micropatterning workflow alone generally spans five to six hours and allows an individual to  
128 pattern eight grids for standard cell-culture on TEM grids.

129

130 A number of the steps during the micropatterning process require long incubation times.  
131 Conveniently, some of these steps, such as PLL passivation or PEG-SVA passivation may be  
132 extended to an overnight incubation. Additionally, grids may be patterned in advance and

133 stored in a solution of the ECM protein or PBS for later use. In our study, these options were  
134 valuable in instances where the timing of cell preparation and seeding is critical such as for  
135 primary *Drosophila* neurons and RSV-infection of BEAS-2B cells.

136

137 We prepare grids in a general biosafety-level 2 (BSL-2) lab setting using clean tools, sterile  
138 solutions, and include antibiotics/antimycotics in the growth media<sup>6,19-21</sup>. For samples  
139 particularly sensitive to microbial contamination, the anti-fouling layer and ECM can be applied  
140 in a tissue culture hood or other sterile environment. Additionally, the grid could be washed in  
141 ethanol between patterning and ECM application. If working with infectious agents, it is  
142 important to adapt the procedure to comply with appropriate biosafety protocols.

143

144 This workflow and the procedures presented (Fig 1 and Fig 2) allowed HeLa cells (Fig 3) and  
145 RSV-infected BEAS-2B cells (Figs 4 & 5), and primary *Drosophila* larval neurons (Figs 6 & 7) to be  
146 seeded onto patterned EM grids to control for cell density and spatial positioning for optimal  
147 cryo-ET data collection.

148

#### 149 **Cultured HeLa cells adhere to and spread out over patterns**

150 We show that HeLa cells seeded onto micropatterned TEM grids remain viable as determined  
151 by fluorescent staining using a calcein-AM and ethidium homodimer-1 based cell viability assay  
152 (Fig 3A & 3B). Using a mixed collagen and fibrinogen ECM, HeLa cells readily adhere to patterns  
153 across the grid (Fig 3A & 3C). The overall morphology of cells that expand along the pattern is  
154 similar to that of cells on grown on unpatterned grids (Fig 3C & 3D). In the case of HeLa cells,  
155 the total cell thickness remains  $\sim < 10 \mu\text{m}$  with significantly thinner areas  $\sim < 1 \mu\text{m}$  thick near the  
156 cell periphery (Fig 3C).

157

#### 158 **Virus infected cells on micropatterned areas remain competent for viral release**

159 For our RSV studies, we patterned entire grid squares using a gradient, with a low-dose  
160 exposure on the edges and a higher dose pattern towards the center (Fig 4A). Gradient patterns  
161 yielded better results when searching for released viruses present near the periphery of cells.  
162 With these patterns, we find that cells preferentially adhere to the higher ECM concentration,  
163 but are also able to adhere to and grow on the lower ECM concentrations. The relative dose  
164 between areas will need to be optimized when using patterns that require multiple doses. If the  
165 doses and thus ECM concentrations are too similar or too disparate to one another, the effect  
166 of using multiple doses will be lost.

167

168 In Fig 4 we show a TEM grid that has been patterned and subsequently seeded with RSV  
169 infected BEAS-2B cells and used for cryo-EM data collection. Fig 4A is a fluorescent image of  
170 ECM patterned onto a TEM grid using a gradient pattern. Cell adhesion and growth along the  
171 central region of the pattern can be seen in Fig 4B, a brightfield image of the cells 18 hours  
172 post-seeding. In Fig 4C, fluorescent signal (red) from replication of RSV-A2mK+ is overlaid with  
173 signal from the ECM. The majority of the infected cells are positioned along the higher density  
174 central region of the gradient pattern. A low-mag TEM map of the grid post cryo-fixation  
175 reveals a number of cells, including RSV-infected cells, positioned on the carbon foil near the  
176 center of the grid squares. As previously shown for cells grown on standard TEM grids<sup>20</sup>, we are

177 able to locate and collect tilt-series of RSV virions in close proximity to the periphery of infected  
178 BEAS-2B cells grown on micropatterned grids (Fig 5A & 5B). Many of the RSV structural proteins  
179 can be identified within the tomograms including nucleocapsid (N) and the viral fusion protein  
180 (F) (Fig 5C).

181

### 182 **Micropatterning allows for optimized distribution and positioning of *Drosophila* neurons on** 183 **TEM grids**

184 For our primary *Drosophila* neuron studies, we found that the narrow pattern, near the  
185 resolution limit offered by PRIMO (where the thickness of the pattern was 2  $\mu\text{m}$ ), allowed from  
186 one to a few cells to be isolated within a grid square (Fig 6). The neuronal soma was able to  
187 extend its neurites over a period of several days within the pattern. This allowed easy  
188 identification and tilt series acquisition of the neurites compared to neurons cultured on  
189 unpatterned grids (Fig 7). We also found that fluorescently-labeled concanavalin A, a lectin that  
190 has been used as an ECM for *in vitro Drosophila* neuronal cultures<sup>18,22</sup>, is amenable for PRIMO  
191 patterning.

192

193 *Drosophila* neurons from third instar larvae were isolated according to previously published  
194 protocols<sup>18,22,23</sup>. The neuronal preparations were applied to micropatterned cryo-EM grids  
195 where concanavalin A was deposited on the pattern to regulate cell placement, spreading, and  
196 organization. The neurons on patterned or unpatterned grids were allowed to incubate for 72-  
197 96 hours and the grids were then plunge frozen. A representative image of a micropatterned  
198 EM grid with several *Drosophila* neurons distributed across the patterned regions is shown in  
199 Fig 6A. These neurons, derived from a transgenic fly strain that has pan-neuronal GFP  
200 expression in the membrane, can be easily tracked by light microscopy not only due to its  
201 fluorescent labeling, but also because of its location within the micropatterns. While neurons  
202 cultured on unpatterned grids can also be tracked through its GFP signaling by light microscopy  
203 (Fig 7A, yellow circle), locating them in cryo-EM became substantially more difficult due to the  
204 presence of cellular debris and contamination from the media (Fig 7B, yellow circle). Such  
205 presence was lessened for neurons on patterned grids, likely due to the pattern being narrow  
206 enough to allow neurons to attach to the grid while excluding undesired contaminants. Due to  
207 the dimensions of the neuron cell body and the extended neurites (Fig 6A & 6B, yellow circle),  
208 cryo-ET tilt series were collected along thinner regions of the cells (Fig 6C & 6D, red circle). The  
209 neuronal cell membrane, a mitochondrion, microtubules, actin filaments, and vesicular  
210 structures were well resolved in higher-magnification image montages and slices through the  
211 3D tomogram (Fig 6E). While similar sub-cellular features can be seen from 3D tomograms of  
212 unpatterned neurons (Fig 7E), the difficulty in locating viable cellular targets for data collection  
213 decreased throughput substantially.

214

215 When first starting with micropatterning, there are a few potential pitfalls that are detrimental  
216 to the final result. We have found that careful grid handling and sterile technique, a uniform  
217 distribution of the PLPP gel, proper dose and focus during patterning, and maintenance of cell  
218 viability prior to seeding are among the most important considerations for success. We have  
219 assembled a list of some of the potential issues as well as solutions in Table 1. In Fig 8 we've  
220 assembled representative images from grids with some of these issues to assist in their

221 identification and troubleshooting. Once optimal conditions are determined, micropatterning  
222 with PRIMO is a reliable and reproducible method for the positioning of cells on grids for cryo-  
223 TEM.

224

## 225 **DISCUSSION:**

226 Substrate micropatterning is a well-established technique for live-cell light microscopy<sup>13,24</sup>  
227 where investigators benefit from the ability to use rigid, durable, and optically transparent  
228 surfaces such as glass coverslips. Micropatterning has also been done on soft and three-  
229 dimensional surfaces. Here we present our application of micropatterning to extend this  
230 technique for cryo-EM studies of multiple cell types by utilizing features such as high resolution  
231 and contactless patterning of the PRIMO system to pattern TEM grids.

232

233 Modern, advanced electron microscopes and software packages now support streamlined  
234 automated cryo-EM and cryo-ET data collection where hundreds to thousands of positions can  
235 be targeted and imaged within a few days<sup>25-28</sup>. One significant limiting factor for whole-cell  
236 cryo-ET workflows has been obtaining sufficient numbers of collectable targets per grid.

237 Recently, a number of groups have developed protocols for micropatterning grids for cryo-EM,  
238 with one advantage being improved data collection efficiency<sup>15-17</sup>. Here we use  
239 micropatterning to optimize cryo-ET studies of primary *Drosophila* neurons and cultured human  
240 cell lines (uninfected or RSV-infected). The PRIMO system is versatile and many steps can be  
241 optimized and tailored to fit specific experimental goals. A user with TEM and fluorescent  
242 microscopy experience can quickly become skilled in grid preparation and micropatterning.  
243 With careful practice, good results should be achievable after a few iterations. Below, we  
244 discuss some of the options available, user considerations, potential benefits, and future  
245 applications of micropatterning for cryo-EM.

246

247 One of the important considerations for whole cell cryo-ET is EM grid selection. EM grids are  
248 composed of two parts: a mesh frame (or structural support) and the foil (or film), which is the  
249 continuous or holey film surface on which cells will grow. Copper mesh grids are commonly  
250 used for cryo-EM of proteins and isolated complexes. However, they are unsuitable for whole-  
251 cell cryo-ET due to the cytotoxicity of copper. Instead, gold mesh is commonly used for cellular  
252 tomography. Other options include nickel or titanium, which may provide benefits over gold  
253 such as increased rigidity<sup>15</sup>. EM grids are available with different mesh dimensions to support a  
254 range of applications. Larger mesh sizes provide more room for cells to grow between grid bars  
255 and more areas that are amenable for tilt series collection, though at the cost of increased  
256 overall specimen fragility. The most commonly used foil is perforated or holey amorphous  
257 carbon, such as Quantifoils or C-flat grids. Biological targets can be imaged either through the  
258 holes in the carbon or through the electron-translucent carbon. Grids such as R 2/1 or R 2/2,  
259 where the holes are 2  $\mu\text{m}$  wide that are spaced 1 and 2  $\mu\text{m}$  apart respectively, provide a large  
260 number of holes and thus a large number of potential areas for data collection. However, some  
261 cells may grow and expand better on more uniform surfaces such as R 1.2/20 grids or  
262 continuous carbon. For downstream sample processing by FIB-SEM, the foil is removed through  
263 milling, reducing concerns over the continued presence of the underlying film. As with the  
264 mesh, foils from other materials are also available, with the patterning protocol presented here

265 being equally suitable for SiO<sub>2</sub> grids. We commonly use gold Quantifoil, continuous carbon, or  
266 SiO<sub>2</sub> film 200-mesh grids (~90 μm spacing between grids bars) for whole-cell cryo-ET.

267

268 There are a number of considerations when designing a pattern. A majority of these decisions  
269 are guided by the cell type and purpose of experiment. A good starting point is to choose a  
270 pattern that approximates the shape and dimensions of the cells in culture. Many studies have  
271 demonstrated significant effects of pattern shape on cell growth and cytoskeletal arrangement  
272 <sup>13,29,30</sup>. Special care should be taken during pattern design if this could alter the target of  
273 interest. We tested several patterns for each cell type to determine which patterns promoted  
274 cellular adhesion and growth. The flexibility of the PRIMO system permits testing of multiple  
275 patterns on a single grid and changing patterns for different grids within a single experiment.  
276 Larger patterns (~50-90 μm), such as those used here, increase the likelihood that multiple cells  
277 adhere to a single region of the pattern and allow cells to expand and extend after adhesion.  
278 More constrained patterns (20-30 μm) may be appropriate in experiments where cell isolation  
279 is more critical than cell expansion, such as for FIB-SEM experiments. For tomography  
280 applications, one may need to consider the impact of the tilt-axis. If a pattern is positioned such  
281 that all cells grow parallel to one another in a single direction, it is possible that all of the cells  
282 will be perpendicular to the tilt-axis when loaded onto the microscope stage, resulting in a  
283 lower quality of data.

284

285 On unpatterned grids, cells often preferentially adhere to the grid bars, where they cannot be  
286 imaged by TEM. Even on patterned grids, we often observe cells which are positioned in the  
287 corners of grid squares partially on both the patterned carbon foil and grid bar. Recently,  
288 micropatterning was used to intentionally position part of the cell over the grid bar <sup>17</sup>. This  
289 could be considered for experiments where it is not critical to have the entire cell periphery on  
290 the foil. This can be especially important for cells that can grow larger than a single grid square,  
291 such as primary neurons growing over multiple days.

292

293 There are many tools that can be used to design a pattern. Here, we limit the pattern to less  
294 than 800 pixels in any dimension such that the pattern can be rotated to any angle and still fit  
295 within the maximum area that can be patterned in a single projection by the PRIMO system. This  
296 allows the user to rotate the pattern to be properly oriented with the grid regardless of the  
297 orientation of the grid on the microscope. In our experiments, we divide the grid into six  
298 patterning areas. Primarily, this allows us to adjust the focus between different regions of the  
299 grid. Gold grids in particular are very malleable and may not laydown completely flat on the  
300 glass. Proper focus is essential for clean, refined patterning results. By using segmented  
301 patterns, we are able to make minor adjustments to the pattern position if the grid shifts  
302 slightly during patterning process, this is usually not an issue when using the PLPP gel and PDMS  
303 stencils. Finally, it allows us to keep the center of the grid unpatterned. Being able to clearly  
304 identify the center of the grid is very useful for correlative-imaging experiments.

305

306 The PRIMO patterning software, Leonardo, also has more advanced features such as stitching  
307 and the ability to import patterns as PDFs which are not described here. Leonardo also includes  
308 microstructure detection and automated pattern positioning that can be used on TEM grids.

309 This feature is most useful when the grid is very flat and can be patterned without the need to  
310 adjust focus between different areas

311

312 Selection of an ECM protein can have a significant impact on cell adhesion and expansion. Some  
313 cells are known to undergo physiological changes when grown on specific substrates<sup>31</sup>. We  
314 tested multiple ECM proteins and concentrations for any new cell type based on prior work  
315 reported in the literature. Laminin, fibrinogen, fibronectin, and collagen are widely used for  
316 cultured cells and can be used as a starting point if other data is not available. However, other  
317 ECM proteins must also be considered if the commonly used ECM proteins fail to confer proper  
318 adherence properties for the cells. This was particularly true for primary *Drosophila* neurons, as  
319 a high-concentration of the plant lectin concanavalin A was necessary for proper cellular  
320 adherence. The compatibility of cellular adhesion and growth with the ECM can be tested by  
321 patterning on glass dishes or slides prior to transitioning to TEM grids. This pre-screening  
322 approach is time and cost effective if a large number of combinations need to be examined. The  
323 inclusion of a fluorescently conjugated ECM protein is valuable for assessing the success and  
324 quality of patterning.

325

326 Cell seeding is one of the most important steps for whole cell cryo-ET, either with or without  
327 micropatterning<sup>6,15,32</sup>. For primary *Drosophila* or other neurons, which are fragile, unstable in  
328 suspension, and may be limited in quantity, single seeding approaches are preferred over  
329 monitored, sequential cell seeding. A single seeding step at an optimized cell density, as  
330 described in the methods for *Drosophila* neurons, is a viable option for most cell types.  
331 However, it is also possible to seed cells onto the substrate at a lower initial concentration and  
332 the add more cells in a monitored fashion as described here and in other literature<sup>17</sup>. This  
333 sequential seeding can provide more consistent results in some cases. Similar to standard cell  
334 culture, care should always be taken to maintain cell viability and minimize cell clumping during  
335 isolation.

336

337 Micropatterned grids can be used to help position cells to establish a consistent cell density  
338 across the grid and to position regions of interest in areas suitable for tilt-series collection. The  
339 placement and positioning of cells can be used as fiducial markers for correlation in cryo-CLEM  
340 experiments, reducing the need for fragile finder-grids and fluorescent fiducial markers.  
341 However, it should be noted that such fiducial markers may still be useful for sub-micron  
342 accuracy correlation<sup>19,33</sup>. Furthermore, an even distribution of isolated cells is also highly  
343 beneficial for FIB-SEM experiments to maximize the number of cells from which lamella can be  
344 cut<sup>15</sup>.

345

346 The addition of micropatterning to cryo-EM workflows will result in measurable improvements  
347 in data throughput and potentially enable new experiments. As the technique is further  
348 adopted and developed, more advanced applications of micropatterning including ECM  
349 gradients, multiple ECM depositions, and microstructure assembly will further expand the  
350 capabilities of cryo-ET to study biological targets and processes in full cellular context.

351

352 **MATERIALS AND METHODS:**



353 The methods and materials (supplementary) described here is a compilation of the cell culture,  
354 micropatterning, and imaging methods used by the Wright lab and the Cryo-EM Research  
355 Center at the University of Wisconsin, Madison. Additional training and instructional materials  
356 are available at the following site: <https://cryoem.wisc.edu>

357

### 358 **Preparation of grids for patterning**

359 Prior to micropatterning 5-8 nm of carbon was evaporated onto the grids in a Leica ACE600  
360 carbon evaporator. Carbon coated grids were stored in a low humidity environment such as a  
361 vacuum desiccator. Within 15-30 minutes of use the grids are placed on either a grid prep  
362 holder (see materials) or a piece of filter paper on a small petri dish and glow discharged for 60  
363 s at 10 mA with an 80 mm working distance and vacuum pressure of  $1.0e^{-3}$  mbar using a Leica  
364 ACE600.

365

### 366 **Application of the anti-fouling layer**

367 Using proper sterile technique the grids were transferred to a clean glass slide or coverslip with  
368 at least 1 cm of separation between the grids. The grids were incubated in 10  $\mu$ L of sterile 0.05  
369 % Poly-L-lysine (PLL) for 30 minutes to overnight in a humid chamber, such as an enclosed  
370 plastic box with moist paper towels. Each grid was washed three times with 15  $\mu$ L of 0.1 M  
371 HEPES pH 8.5. For each wash, most of the liquid is removed from the grid with a pipet without  
372 letting the grid dry. The grids are then incubated in 15  $\mu$ L fresh HEPES pH 8.5 for at least 30  
373 seconds and left in the final wash.

374

375 10  $\mu$ L of 100 mg/mL Poly-ethylene glycol-succinimidyl valerate (PEG-SVA) in 0.1 M HEPES pH 8.5  
376 was prepared for each grid immediately prior to use. PEG-SVA has a half-life of 10 minutes at  
377 pH 8.5. It is important to avoid exposing the PEG-SVA stock to excessive moisture by storing in a  
378 desiccator or dry environment and warming to room temperature before opening. PEG-SVA  
379 dissolves quickly with gentle mixing resulting in a clear solution. The 15  $\mu$ L drop of HEPES pH 8.5  
380 was removed from each grid followed by incubation in a 10  $\mu$ L drop of the PEG-SVA solution.  
381 The grids are kept in a humid chamber to prevent drying during this incubation for one hour to  
382 overnight. Following PEG-SVA coating, each grid is washed three times with 15  $\mu$ L sterile water.  
383 For each wash. The grids are then stored in 15  $\mu$ L water in a humid chamber until the next step.

384

### 385 **Applying PLPP gel**

386 A clean microscope coverslip was prepared for each grid. A 1.0  $\mu$ L drop of water was placed in  
387 the center of a new coverslip for each grid to assist in placing the grid on the coverslip and  
388 keeping the grid wet. The grids are then carefully transferred from the 15  $\mu$ L water drop to the  
389 1.0  $\mu$ L drop on the coverslip carbon side up. We then carefully place a PDMS stencil over the  
390 grid, taking care to keep the grid centered and to minimize stencil contact with the carbon foil  
391 of the grid. Next, we pipet 1.0  $\mu$ L of PLPP gel onto each grid and mix gently by pipetting. Finally,  
392 the gel is allowed to dry in a dark environment for 15-30 minutes.

393

### 394 **Calibration and design of the micropattern**

395 The PRIMO system was calibrated using a glass coverslip with highlighter on one side. The slide  
396 was placed on the microscope, highlighted sides down, and brought into focus. After setting up

397 the appropriate light path and starting up the PRIMO system, we followed the on screen  
398 instructions to calibrate the system. During this calibration the UV laser is used to project an  
399 image onto the slide which must be brought into focus before proceeding. Following  
400 calibration the micrometer/pixel ( $\mu\text{m}/\text{px}$ ) ratio is reported under Calibration data in the top left  
401 window of Leonardo (Fig 2, area 1). This ratio is needed to determine the number of pixels to  
402 use per micrometer when designing a pattern.

403  
404 In order to measure the grid to determine pattern size, we loaded a prepared grid on a  
405 coverslip (from above) onto the stage with the grid facing the objective lens. We then adjust  
406 stage position and focus so that the grid is visible in the Leonardo software window. We used  
407 the ruler function built-in to Leonardo activated by the button near the bottom left corner to  
408 measure the grids (Fig 2, area 2). For example, the patterns used here for a 200 mesh grid were  
409 measured to have  $\sim 87 \times 87 \mu\text{m}$  grid squares and  $\sim 36 \mu\text{m}$  grid bars. The Leonardo software  
410 offers flexibility in resizing patterns on-the-fly, so minor inaccuracies in measurement can be  
411 tolerated.

412  
413 We then designed the patterns used in Figures 3-8 based on the measurements and ratios  
414 reported in the steps above. Patterns can be designed in any image creation software. The  
415 minimum feature size with a 20 $\times$  objective is 1.2  $\mu\text{m}$ . Patterns should be saved as  
416 uncompressed 8-bit .tiff files. Be sure the software does not rescale images to a different pixel  
417 size when saving. The pattern should fit within an 800 $\times$  800 pixel box, which is sufficient to  
418 cover four grid squares. Pixels with a value of 255 (white) will be patterned at the highest  
419 intensity (total dose of the laser) and pixels with a value of zero (black) will not be patterned.  
420 Any pixels with an intermediate value will be patterned with a dose of approximately  
421  $(X/255) \times \text{total dose}$ . In Fig 4A, pixel values of 255 and 129 were used for the greyscale patterns.  
422 Once the pattern is designed it can be saved and reused without modification.

423

#### 424 **Micropatterning**

425 For our initial run we created a new 3000  $\mu\text{m}$  ROI In Leonardo using the Add ROI function (not  
426 shown, in the location of Fig 2 area 3). For subsequent runs we reloaded and modified this  
427 initial template. We used the Add Pattern function (not shown, in the location of Fig 2 area 3)  
428 to place six patterns on each grid which allow for independent focusing and positioning in each  
429 region. An 8 $\times$  8 grid square region for each corner of the grid and a 2 $\times$  8 grid square region on  
430 each side of the center, leaving the center four grid squares unpatterned (Fig 2, center image).  
431 The replication options (Fig 2, area 4) were used to generate copies of the initial pattern to  
432 reach the desired number of total copies of the pattern.

433

434 The angle, position, space between, and ratio (size) of the patterns were iteratively adjusted  
435 using the exper options panel (Fig 2, area 4) until the patterns aligned with the grid squares.  
436 Total dose was set to 30 or 45  $\text{mm}/\text{mJ}^2$  (see discussion) with 100% laser power for each  
437 pattern. The template file was saved within Leonardo for use in future experiments (Fig 2, area  
438 6, bar with up arrow icon in top toolbar).

439

440 Each of the six regions on the grid were patterned one at a time by selecting only a single  
441 pattern in Action panel (Fig 2, area 5). Prior to patterning a region we navigate to that region  
442 and focus on the carbon foil. Focusing on the area to be patterned is an essential step. After  
443 patterning we remove the coverslip from the microscope and immediately pipet 10  $\mu$ L of sterile  
444 PBS onto the grid. After 10 minutes the PDMS stencil is removed the grid is washed 3  $\times$  with 15  
445  $\mu$ L PBS and stored in PBS until the next step.

#### 446 447 **Deposition of ECM proteins for cultured cells**

448 Each grid was incubated for one hour at room temperature or overnight at 4°C in 15  $\mu$ L of  
449 freshly prepared ECM solution. For BEAS-2B cells a final concentration of 0.01 mg/mL bovine  
450 fibronectin and 0.01 mg/mL fluorophore-conjugated fibrinogen in sterile PBS was used. For  
451 HeLa cells we used 0.01 mg/mL bovine collagen I and 0.1 mg/mL fluorophore-conjugated  
452 fibrinogen in sterile PBS. After incubation in ECM the grids are washed 5x with sterile PBS and  
453 stored in PBS at 4°C. We have stored grids for up to a week in PBS at 4 °C with no observed  
454 deterioration in quality.

#### 455 456 **Deposition of ECM proteins for *Drosophila* neurons**

457 For primary *Drosophila* neurons, the patterned grids were first moved to a 30 mm glass bottom  
458 dish containing sterile PBS. The PBS was then aspirated from the dish and replaced with 2 mL  
459 of 0.5 mg/mL fluorescently conjugated concanavalin A. The grids were incubated in this  
460 solution overnight at 25°C before 3x washes in 2 mL PBS. After the final wash the grids are  
461 incubated at 25°C in 2 mL of freshly-prepared, sterile-filtered supplemented Schneider's  
462 *Drosophila* media <sup>22</sup>, containing 20% heat-inactivated FBS, 5  $\mu$ g/mL insulin, 100  $\mu$ g/mL penicillin,  
463 100  $\mu$ g/mL streptomycin, and 10  $\mu$ g/mL tetracycline until the neurons are ready to be plated.

#### 464 465 **Preparation of primary *Drosophila* cells prior to seeding**

466 All dissection dishes were sterilized with 70 % EtOH, then submerge the plate with 2-3 mL of  
467 sterile-filtered 1 $\times$  dissection saline (9.9 mM HEPES pH 7.5, 137 mM NaCl, 5.4 mM KCl, 0.17 mM  
468 NaH<sub>2</sub>PO<sub>4</sub>, 0.22 KH<sub>2</sub>PO<sub>4</sub>, 3.3 mM glucose, 43.8 mM sucrose) <sup>22</sup>.

469  
470 Thirty to forty 3<sup>rd</sup> instar larvae were gently removed from the food using a pair of tweezers  
471 and placed into a tube of PBS and transferred to a fresh tube of PBS. The larvae were then  
472 transferred into a tube of 70% EtOH and a second fresh tube of 70% EtOH for 2-3 minutes to  
473 sterilize the larvae. A final rinse was done in dissection saline by transferring the larvae through  
474 two tubes of dissection saline. The larvae were then transferred to a dissecting dish containing  
475 1  $\times$  dissection saline. The brains were extracted with a pair of forceps and a dissection  
476 microscope and transferred to a third tube with 1  $\times$  dissection saline. The brains are washed  
477 three times by centrifugation at 300 x g for 1 minute followed by discarding and replacing the  
478 supernatant with 1 mL of fresh 1  $\times$  dissection saline, leaving 200-250  $\mu$ L after the final wash.

479  
480 To digest the tissue we added 20  $\mu$ L of 2.5 mg/mL Liberase in 1 x dissection saline to the  
481 remaining 200-250  $\mu$ L volume and rotated the tubes for one hour at room temperature. The  
482 solution was mixed by pipetting 25-30 times every ten minutes during this step. The solution  
483 was centrifuged for 5 minutes at 300 x g and supernatant was replaced with 1 mL of

484 supplemented Schneider's *Drosophila* media. This was repeated 3 x, leaving 300  $\mu$ L of volume  
485 after the final step. The cells were pipetted 30-40 times to mix.

486

#### 487 **Culture and RSV infection of BEAS-2B and HeLa cells**

488 HeLa cells and BEAS-2B cells are maintained in T75 flasks at 37 °C and 5 % CO<sub>2</sub>. Cells are  
489 passaged every 3-4 days once reaching approximately 80 % confluency. HeLa cells are  
490 maintained in DMEM + 10 % FBS + 1  $\times$  Antibiotic-Antimycotic. BEAS-2B are maintained in RPMI  
491 + 10 % FBS + 1  $\times$  Antibiotic-Antimycotic<sup>6,20,34</sup>. Prior to RSV infection 5 $\times$ 10<sup>4</sup> cells per well were  
492 passaged into a 6-well plate (surface area  $\sim$ 9.6 cm<sup>2</sup>) with 2mL of growth media and incubated  
493 overnight. The next day one well of cells was trypsinized and used for cell counting. Media was  
494 aspirated from the well and washed with 2 mL sterile PBS without Mg<sup>2+</sup> and Ca<sup>2+</sup> to remove  
495 residual media. The well was then incubated in 500  $\mu$ L 0.25 % trypsin solution at 37 °C for 5-10  
496 min. Once the cells were released they were diluted with 1.5 mL culture media. The cells were  
497 counted using a hemacytometer and trypan blue staining.

498

499 Media was then aspirated from the remaining wells and replaced with 750  $\mu$ L of media with  
500 RSV-A2mK+<sup>35</sup> at a concentration calculated to achieve MOI 10. The MOI of RSV-A2mK+ can be  
501 calculated from fluorescent focus units (FFU) titers of the stock (For example: for 1.0 $\times$ 10<sup>5</sup> cells  
502 per well and an RSV stock of 1.0 $\times$ 10<sup>8</sup> FFU/mL, dilute the viral stock 1:75 to 1 $\times$ 10<sup>6</sup> FFU/750  $\mu$ L or  
503 1.33 $\times$ 10<sup>6</sup> FFU/mL). The plate was incubated with rocking at room temperature for one hour.  
504 After one hour the total volume per well was brought to 2 mL with growth media pre-warmed  
505 to 37°C and place the plate in an incubator set to 37 °C with 5 % CO<sub>2</sub> for 6 hours. The cells were  
506 trypsinized for seeding as described below. After seeding the grids were incubated for an  
507 additional 18 hours before plunge freezing (for a total 24 hours post-infection).

508

#### 509 **Cell seeding of cultured cells onto micropatterned grids**

510 The cells from each well were released with trypsin at a confluency of 60% or less to avoid  
511 aggregation. The cells were counted using trypan blue staining and a hemacytometer and  
512 diluted to 2 $\times$ 10<sup>4</sup> cells/mL in prewarmed media.

513

514 One  $\mu$ L of media was placed in the center of a glass bottom dish and a micropatterned grid was  
515 transferred to the dish. Ten  $\mu$ L of cell solution was added to each grid and incubated at 37°C for  
516 five minutes. Every five minutes the grids were checked with a brightfield microscope and an  
517 additional 10  $\mu$ L of cells were added until all patterns were occupied or many patterns had  
518 multiple cells. The grids were incubated for 2 hours (37 °C, 5 % CO<sub>2</sub>) after the final addition of  
519 cells before the addition of 2 mL of growth media and overnight incubation.

520

#### 521 **Cell seeding of primary *Drosophila* neurons onto micropatterned grids**

522 Media was removed from the dish containing the micropatterned grids and the cells were  
523 plated onto the grids. After a 30-60 minute incubation at 25°C to allow for cell attachment, the  
524 dish was flooded with 2 mL of supplemented Schneider's *Drosophila* media. The neurons were  
525 cultured for a minimum of 2-3 days in a 25 °C incubator before plunge-freezing.

526

#### 527 **LM imaging, vitrification, and cryo-EM imaging of patterned grids**

528 All grids were checked before and after cell seeding using a Leica DMI8 with a 20X objective for  
529 brightfield and fluorescent imaging. This ensures the grid quality is suitable for cryo-  
530 preservation and data collection. Images were processed in the FIJI software package <sup>36</sup>.

531

532 Primary *Drosophila* neurons were prepared on a Leica EM-GP and BEAS-2B cells were prepared  
533 using the Gatan CP3. Gold fiducials were applied to all samples to allow for proper alignment of  
534 tilt series. Primary *Drosophila* neurons were blotted for 4 s from the backside. For HeLa and  
535 BEAS-2B cells we used double sided blotting for 4-6 s. The frozen grids can be stored in liquid  
536 nitrogen until further use.

537

538 Cryo-EM data was collected on a Titan Krios set at 300 kV with a direct electron detector  
539 camera. Tilt-series were collected for each region of interest using SerialEM <sup>37</sup>. Tilt-series of  
540 primary *Drosophila* neurons were collected from -60° to 60° bidirectionally at 2 ° increments  
541 using a Falcon3 detector at -8 μm defocus with a pixel size of 4.628 Å for a total dose of 70-75 e<sup>-</sup>  
542 /Å<sup>2</sup>. Tilt-series of RSV-infected BEAS-2B were collected on a Gatan K3 with a BioQuantum  
543 energy filter (20 eV slit) at -5 μm defocus with a pixel size of 4.603 Å and total dose of ~80 e<sup>-</sup>/Å<sup>2</sup>.  
544 The tilt series were aligned and reconstructed into tomograms using IMOD package <sup>38</sup>; lowpass  
545 filtering was done using the EMAN2 software package <sup>39</sup>.

546 **FIGURE AND TABLE LEGENDS:**

547

548 **Prepare grids**

549

550

551

552

553

554

555

556

557

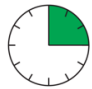

Approx.  
3 hours

Carbon coat and glow discharge grids  
Incubate grid in PLL and wash  
Incubate grid PEG-SVA and wash  
Add PDMS stencil over grid on coverslip  
Add PLPP gel and dry

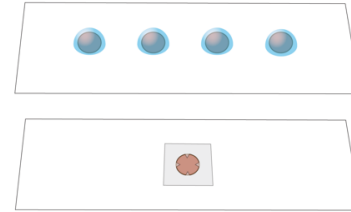

558 **Micropatterning**

559

560

561

562

563

564

565

566

567

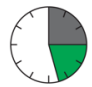

Approx.  
20 min/grid

Load grid onto microscope  
Load/design pattern template  
Position pattern on grid  
Pattern grid  
Wash grid in PBS

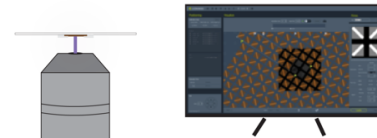

568 **ECM and cell seeding**

569

570

571

572

573

574

575

576

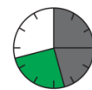

2-3 hours

Incubate grid in ECM and wash  
Prepare cells  
Add cells to grid  
Add media and grow in incubator

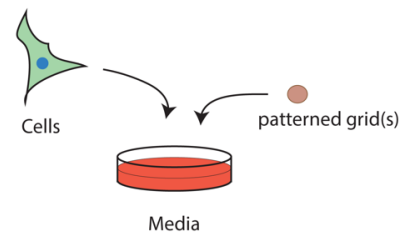

577 **Cryo-preparation and data-collection**

578

579

580

581

582

583

584

585

Time varies  
significantly  
based on  
workflow

Screen grids by light microscopy  
Plunge-freeze grids  
Cryo-CLEM or FIB-SEM (optional)  
Cryo-electron tomography

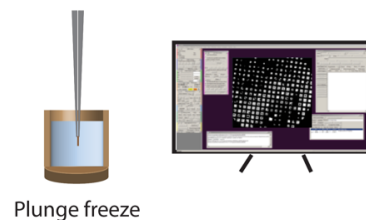

586 **Figure 1. General workflow of micropatterning for cryo-EM.** The workflow can be roughly

587 divided four parts: Grid preparation, micropatterning, ECM and cell seeding, and cryo-

588 preparation and data collection. Major steps of each section are listed below the headings and

589 the approximate time to complete each section is shown to the left

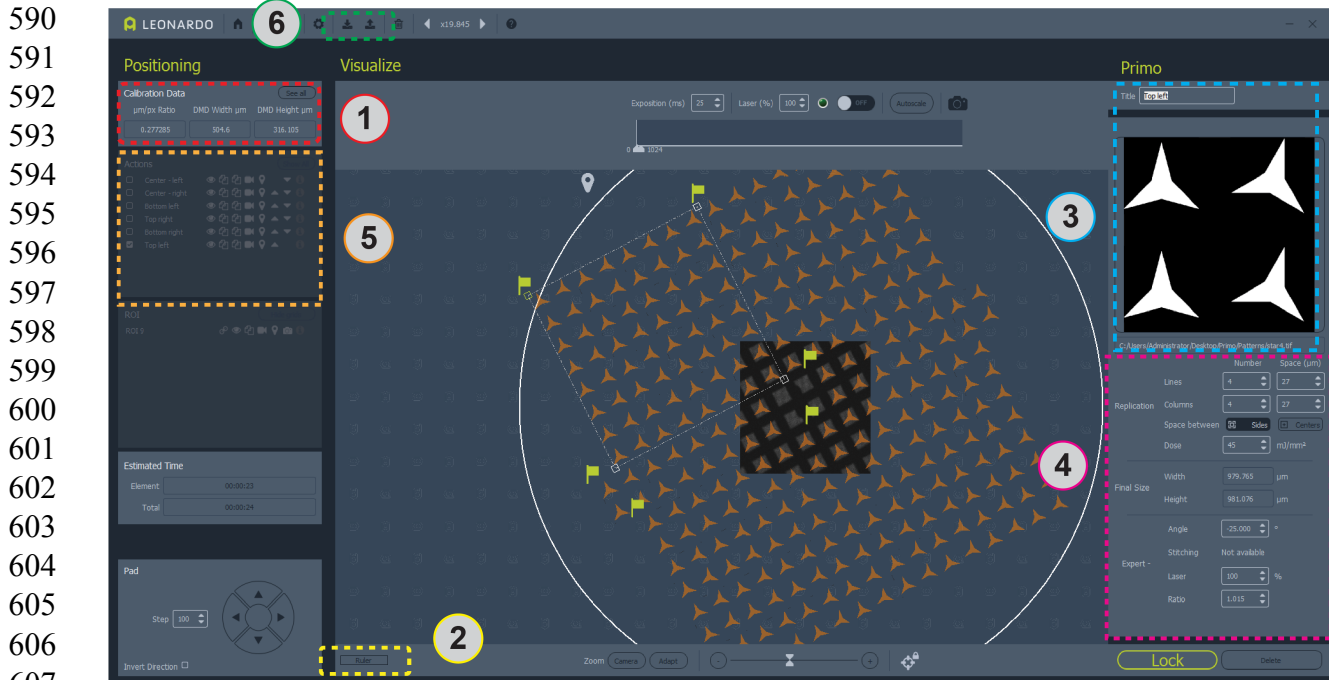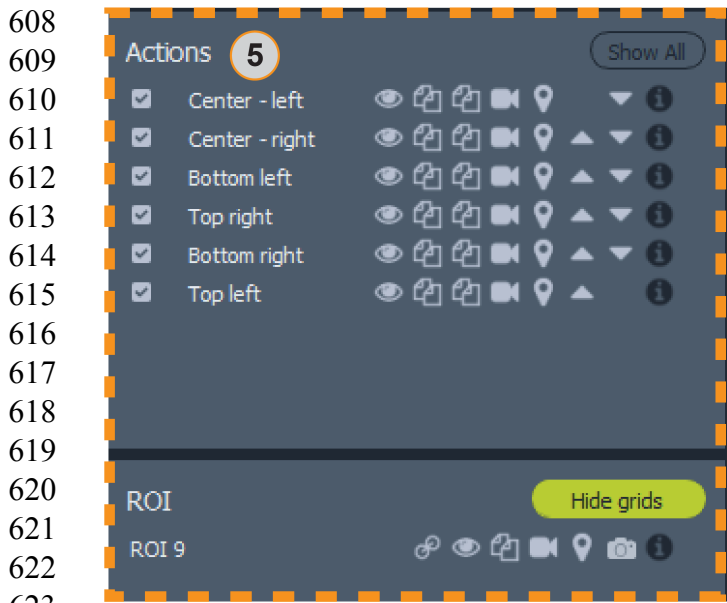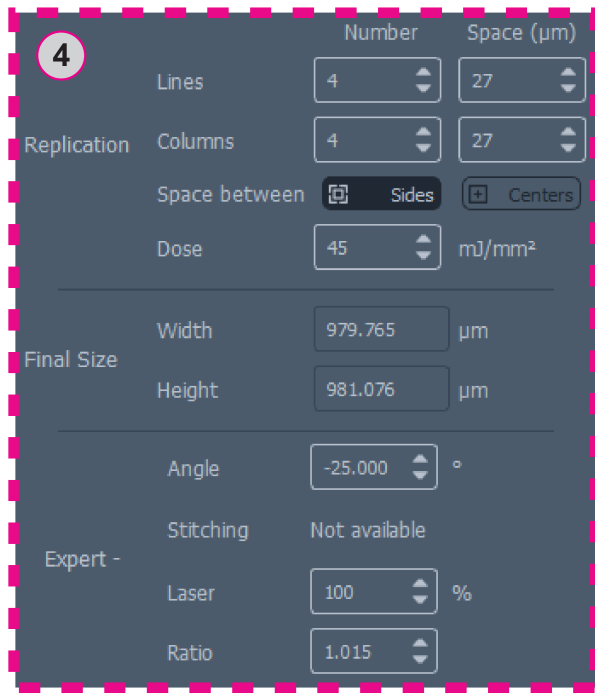

627 **Figure 2. Screen shot of Leonardo software with pattern positioned on grid.** Area 1 contains  
628 the  $\mu\text{m}/\text{pix}$  ratio for pattern design. Area 2 is the ruler for measuring your grid. Area 3 is where  
629 to add or change patterns and ROIs. Area 4 contains all of the information for pattern  
630 positioning and dose. Area 5 contains options for patterns including toggling overlays, copying  
631 or deleting patterns, and selecting patterns for micropatterning. Area 6 is where templates can  
632 be saved and loaded. Larger views of areas 4 and 5 are shown below for clarity.  
633

634  
635  
636  
637  
638  
639  
640  
641  
642  
643  
644  
645  
646  
647  
648  
649  
650  
651  
652  
653  
654  
655  
656  
657  
658  
659  
660  
661  
662  
663  
664  
665  
666  
667  
668

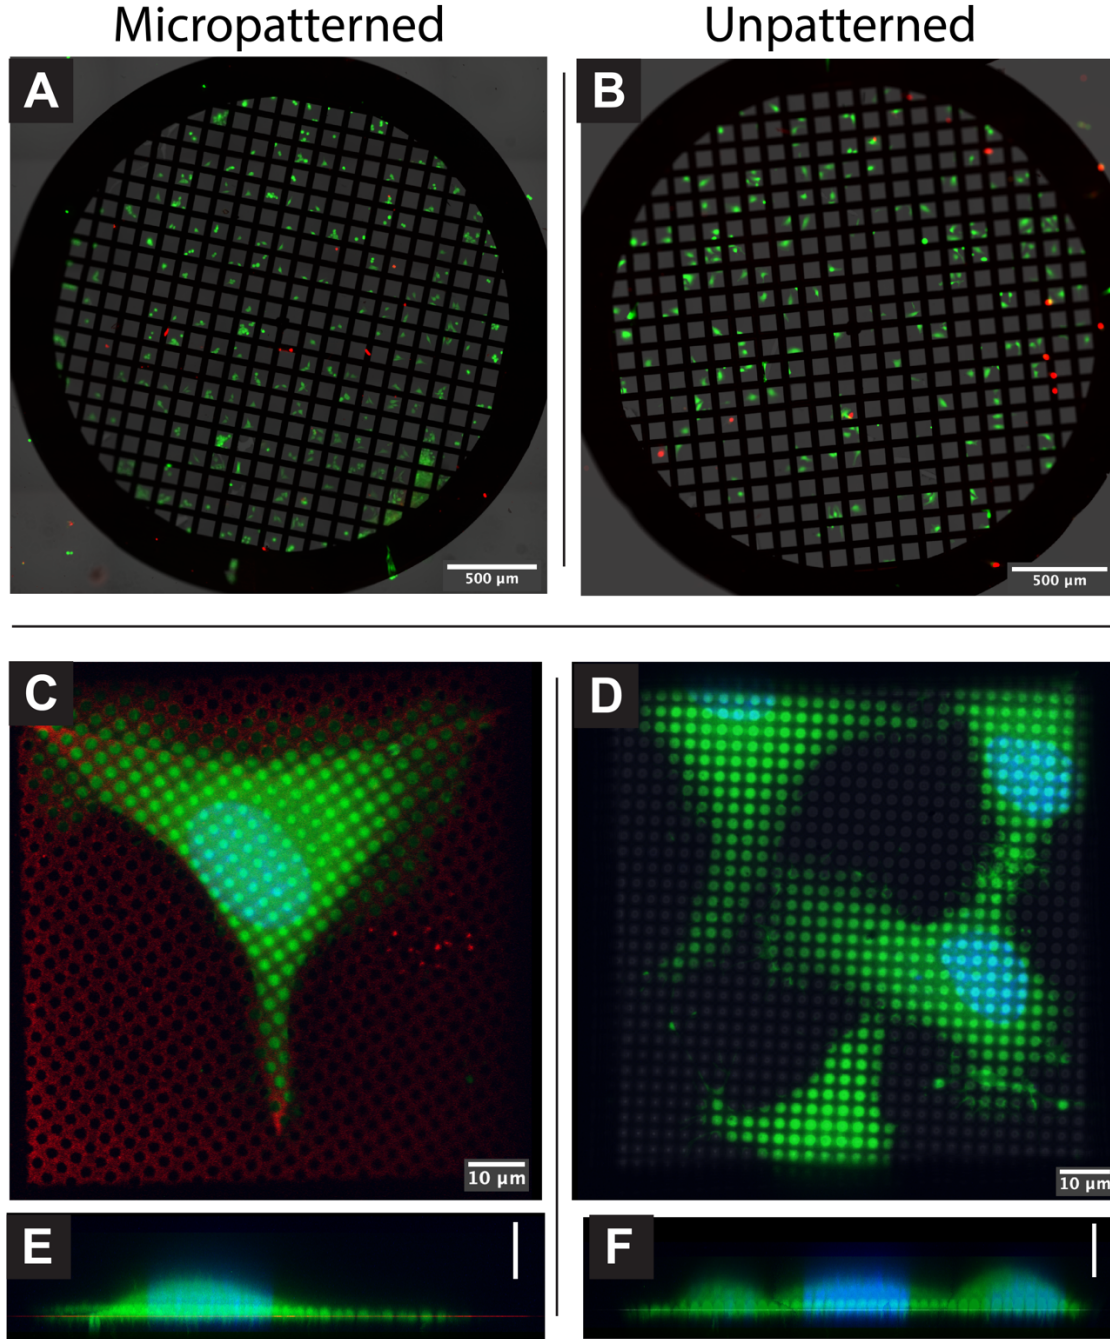

669 **Figure 3. Live/Dead staining of patterned and unpatterned cells.** **A.** Fluorescent image of HeLa  
670 cells grown on a patterned grid and stained with calcein-AM (live cell stain, green) and ethidium  
671 homodimer-1 (dead cell stain, red). **B.** HeLa cells grown on an unpatterned grid and stained as  
672 in **A.** **C.** Projection of confocal z-stacks of a HeLa cell on a patterned Quantifoil R2/2 grid with  
673 0.01 mg/mL collagen and fibrinogen 647 ECM (red). Cell was stained with calcein-AM (green)  
674 and Hoechst-33342 (blue). **D.** X,Z projection of **C.** **E.** HeLa cell on unpatterned grid incubated  
675 with 0.01 mg/mL collagen and fibrinogen 647 ECM, incubated and stained with calcein-AM and  
676 Hoechst-33342. The fluorescent images were merged with transmitted light (grayscale). **F.** X,Z  
677 projection of **D.** Images are pseudocolored. All scale bars are 10  $\mu\text{m}$ .



678  
679  
680  
681  
682  
683  
684  
685  
686  
687  
688  
689  
690  
691  
692  
693  
694  
695  
696  
697  
698  
699  
700  
701  
702  
703  
704  
705  
706  
707  
708  
709  
710  
711  
712  
713  
714  
715  
716  
717  
718  
719  
720  
721

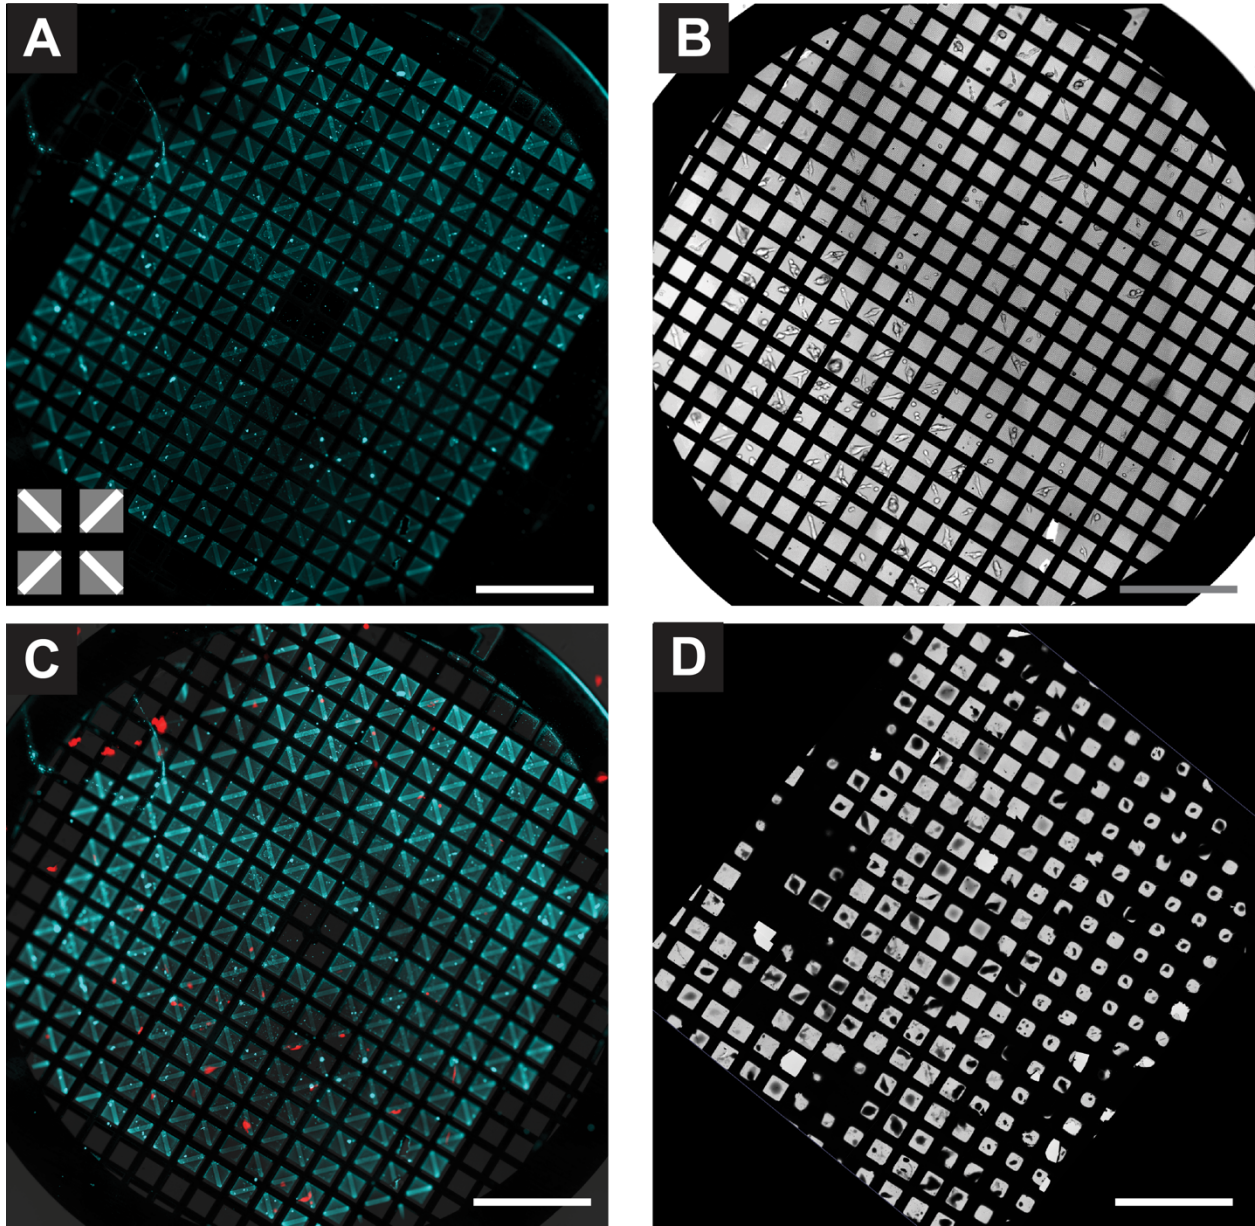

**Figure 4. RSV infected BEAS-2B cells on patterned cryo-TEM grid. A.** Fluorescent image of patterned grid after addition of fluorescently labelled ECM. The input pattern is shown in the lower left corner. **B.** Brightfield image of BEAS-2B cells grown on grid in A. **C.** Merge of image in A (cyan) and B (grey) with fluorescent image of RSV infected cells (red) immediately prior to plunge-freezing; infected cells express mKate-2. Scale bar 500  $\mu\text{m}$ . Fluorescent images are pseudocolored. **D.** Low-magnification cryo-TEM map of grid in B after plunge-freezing.

722  
723  
724  
725  
726  
727  
728  
729  
730  
731  
732  
733  
734  
735  
736  
737  
738  
739  
740  
741  
742  
743  
744  
745  
746  
747  
748  
749  
750  
751  
752  
753  
754  
755  
756  
757  
758  
759  
760  
761  
762  
763  
764  
765

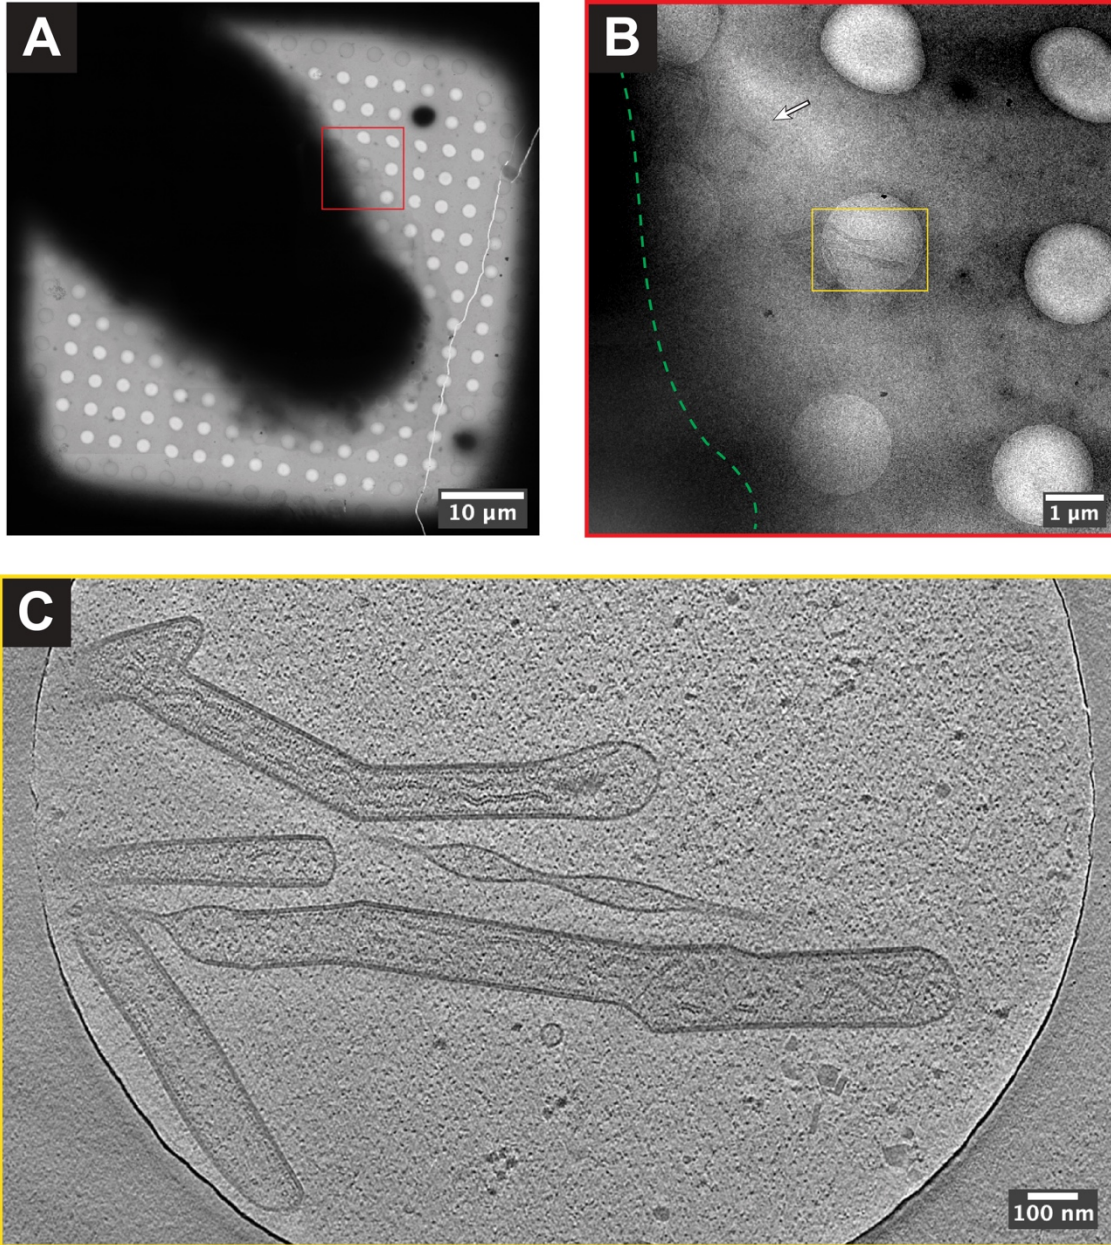

**Figure 5. Cryo-ET of RSV infected BEAS-2B cell on patterned cryo-TEM grid. A.** Cryo-EM grid square map of RSV infected BEAS-2B cell. **B.** Higher resolution image of area boxed in red in (A). Approximate cell boundary is indicated by dashed green line. RSV virions can be seen near the cell periphery (white arrow and yellow box). **C.** Single z-slice from tomogram collected in the area of the yellow box in (B). The scale bars in (A)-(C) are embedded in the image.

766  
767  
768  
769  
770  
771  
772  
773  
774  
775  
776  
777  
778  
779  
780  
781  
782  
783  
784  
785  
786  
787  
788  
789  
790  
791  
792  
793  
794  
795  
796  
797  
798  
799  
800  
801  
802  
803  
804  
805  
806  
807  
808  
809

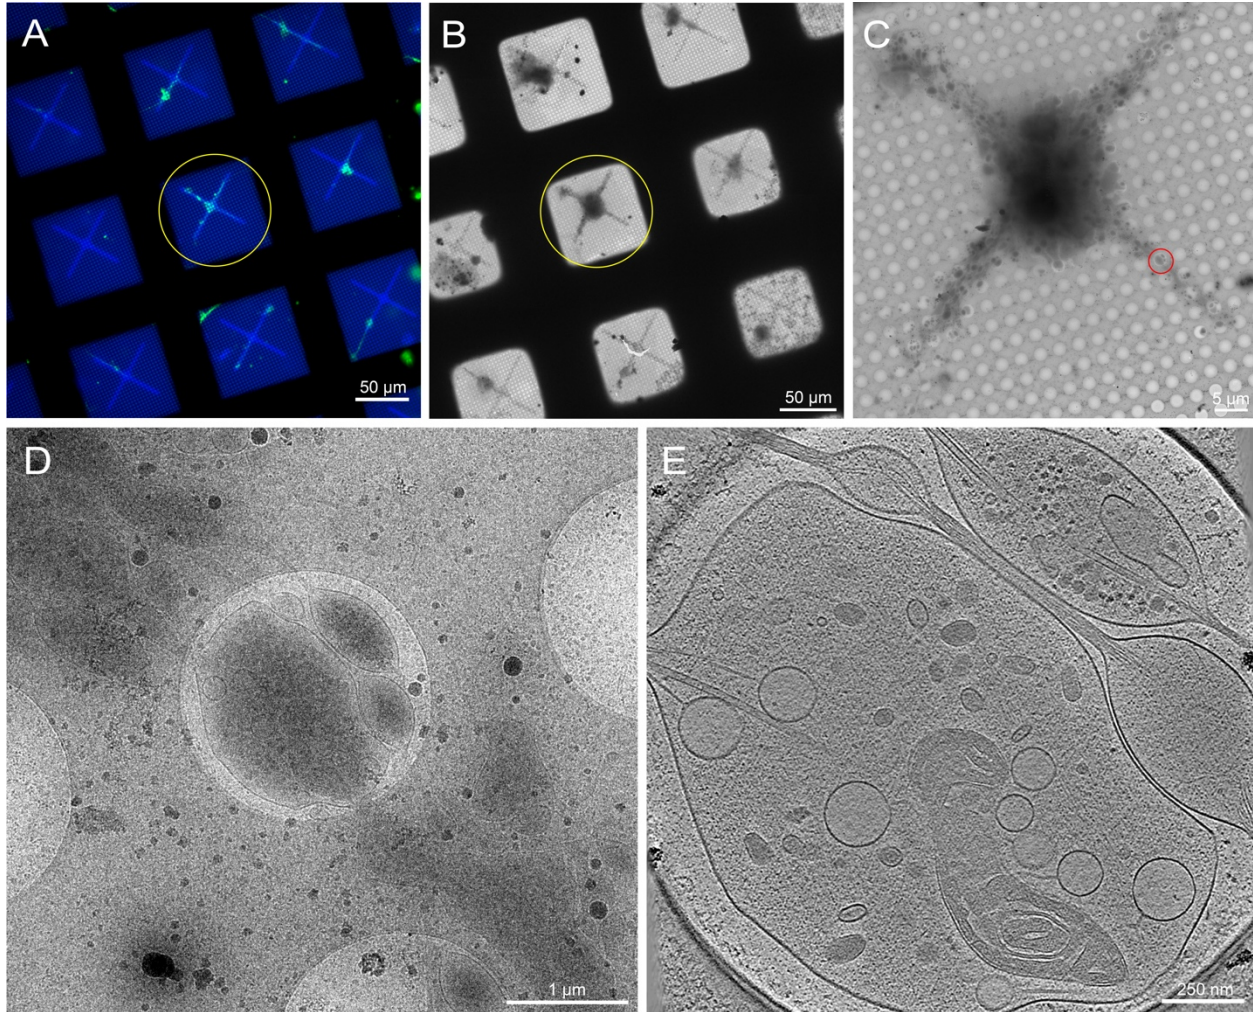

**Figure 6. Primary neurons derived from the brains of 3<sup>rd</sup> instar *Drosophila melanogaster* larvae on patterned cryo-TEM grid.** **A.** Overlaid live-cell fluorescent microscopy grid montage of *Drosophila* neurons expressing membrane-targeted GFP on patterned grid squares with 0.5 mg/mL fluorescent concanavalin A. Green: *Drosophila* neurons. Blue: Photopattern. **B.** Cryo-EM grid montage of the same grid in (A) after plunge-freezing. Yellow circle shows the same grid square as in (A). **C.** Magnified cryo-EM square montage of the yellow circle in (A) and (B). **D.** Magnified view of the red circle in (C), where a tilt series was collected on the neurites. **E.** 25 nm thick slice of a tomogram reconstructed from the tilt series that was acquired from the red circle in (C). Various organelles can be seen in this tomogram, such as the mitochondria, microtubules, dense core vesicles, light vesicles, the endoplasmic reticulum, and actin. Macromolecules, such as ribosomes, can also be seen in the upper right corner. Fluorescent images are pseudocolored. The scale bars in (A)-(E) are embedded in the image.

810  
811  
812  
813  
814  
815  
816  
817  
818  
819  
820  
821  
822  
823  
824  
825  
826  
827  
828  
829  
830  
831  
832  
833  
834  
835  
836  
837  
838  
839  
840  
841  
842  
843  
844  
845  
846  
847  
848  
849  
850  
851  
852  
853

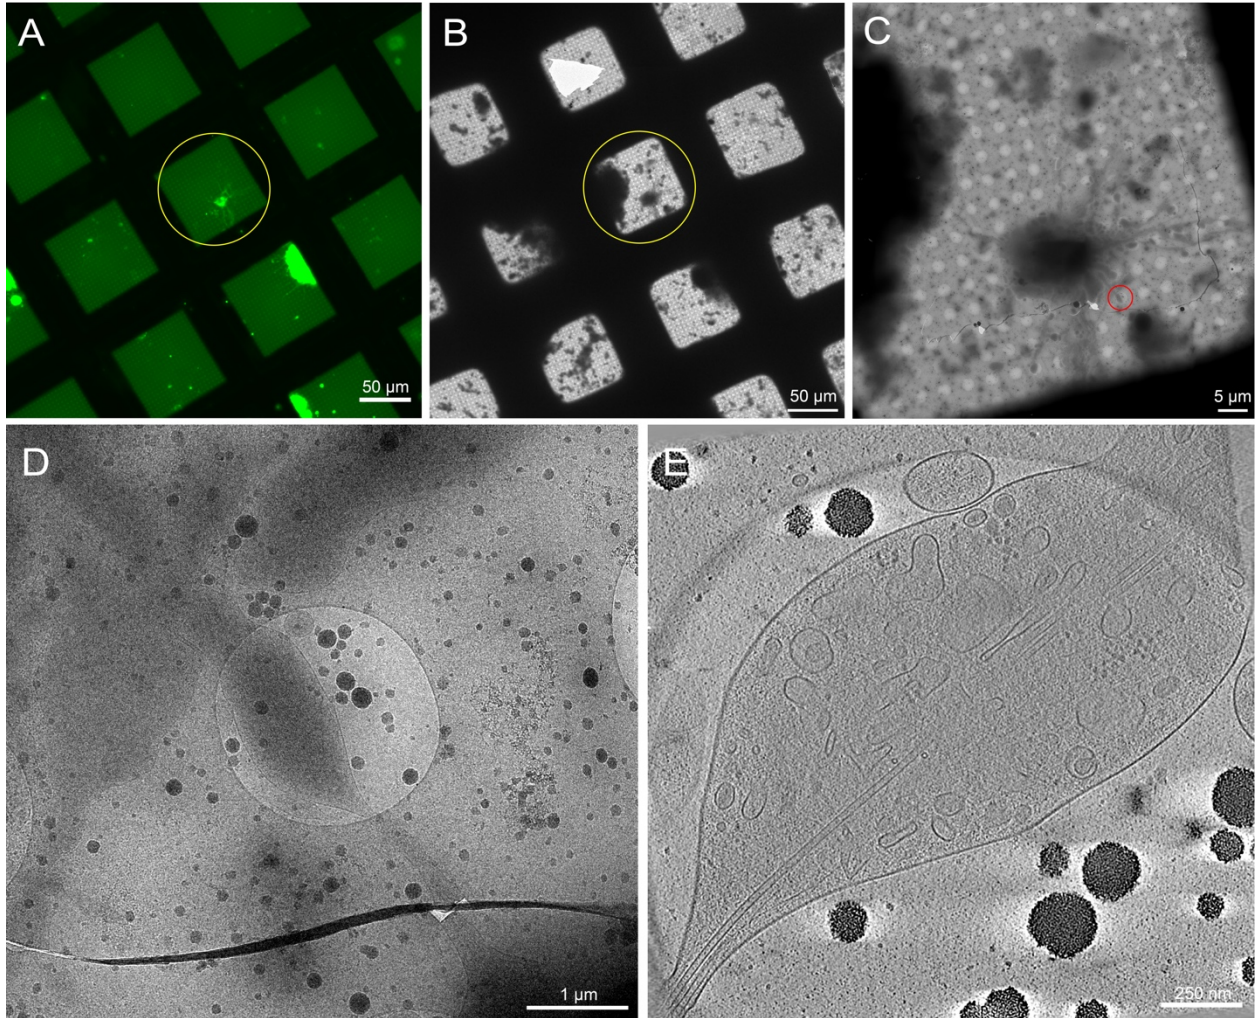

**Figure 7. Primary neurons derived from the brains of 3<sup>rd</sup> instar *Drosophila melanogaster* larvae on unpatterned grids. A.** Live-cell fluorescent microscopy grid montage of *Drosophila* neurons expressing membrane-targeted GFP on grid squares with 0.5 mg/mL concanavalin A. Green: *Drosophila* neurons. **B.** Cryo-EM grid montage of the same grid in (A) after plunge-freezing. Yellow circle shows the same grid square as in (A). Note the presence of cellular debris and media contamination, which made target identification difficult compared to patterned grids. **C.** Magnified cryo-EM square montage of the yellow circle in (A) and (B) maps. **D.** Magnified view of the red circle in (C), where a tilt series was collected on the neurites. **E.** 25 nm thick slice of a tomogram reconstructed from the tilt series that was acquired from the red circle in (C). Various organelles can be seen in this tomogram, such as microtubules and vesicles. Macromolecules, such as ribosomes, can also be seen. Fluorescent images are pseudocolored. The scale bars in (A)-(E) are embedded in the image.

854  
855  
856  
857  
858  
859  
860  
861  
862  
863  
864  
865  
866  
867  
868  
869  
870  
871  
872  
873  
874  
875  
876  
877  
878  
879  
880  
881  
882  
883  
884  
885  
886  
887  
888  
889  
890  
891  
892  
893  
894  
895  
896  
897

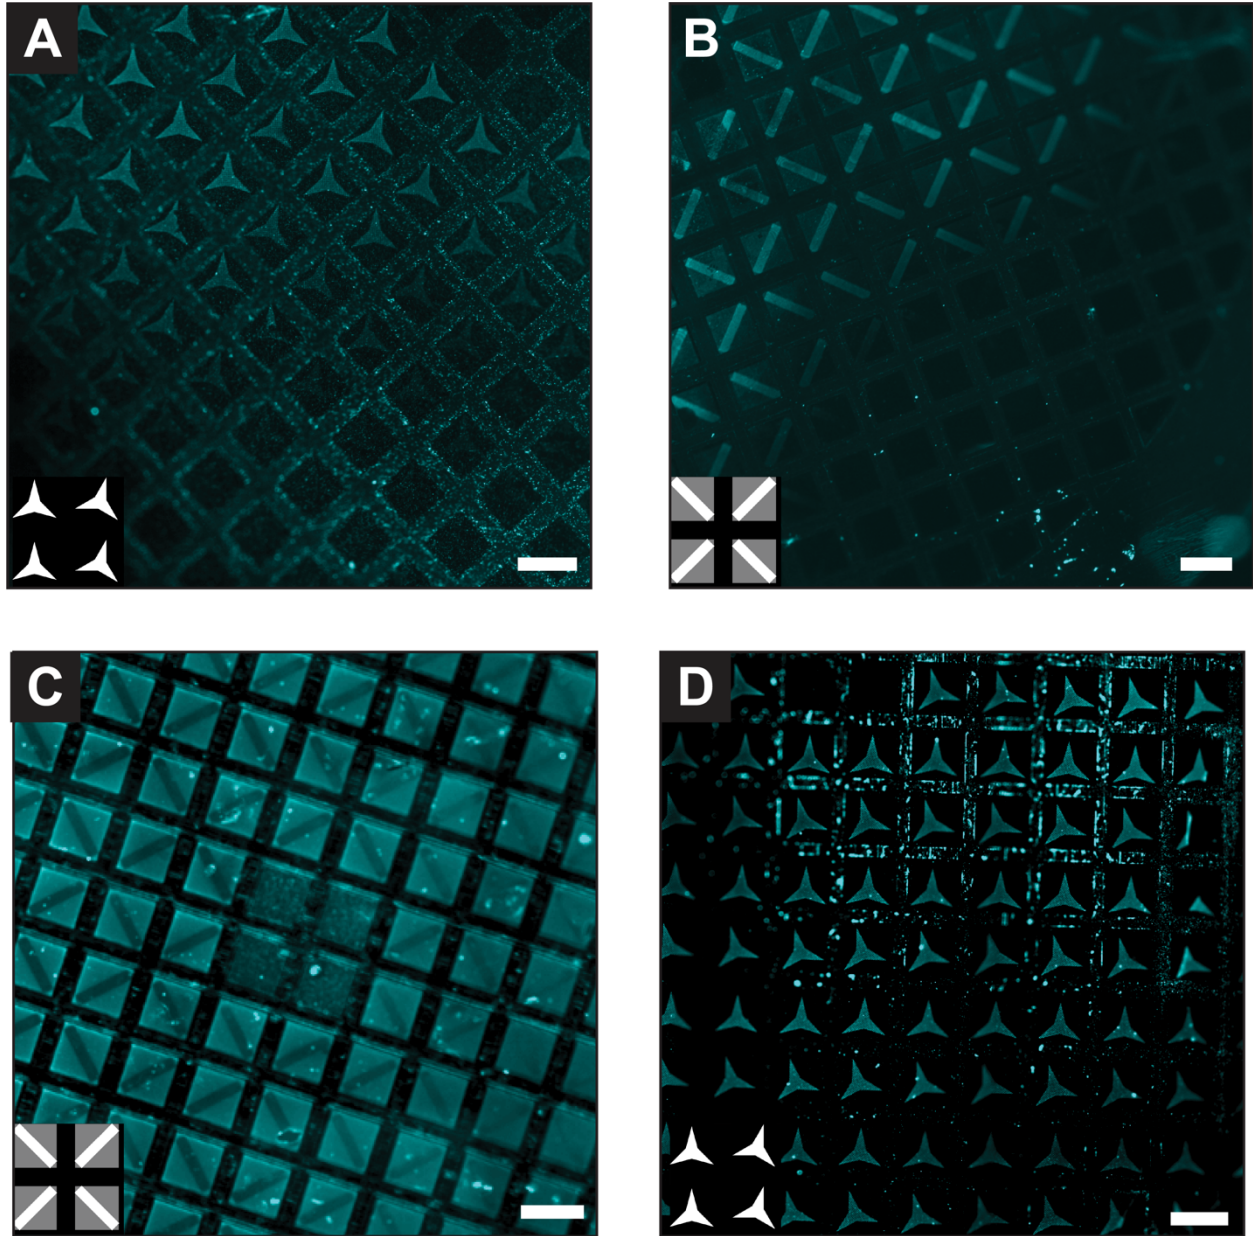

**Figure 8. Examples of possible problems with patterning.** Fluorescent images of labelled ECM deposited on micropatterned grids. **A.** Uneven patterning across the grid due to uneven distribution of PLPP gel. **B.** ECM cannot adhere to areas covered by the PDMS stencil during patterning. **C.** Saturated gradient pattern (right side) or inverted pattern (left) on a grid patterned with too high total dose. **D.** ECM is adhering to areas on the grid bars as well as patterned area due to reflections of the UV laser during patterning. Images are pseudocolored; input pattern is shown in lower left; scale bars are 100  $\mu\text{m}$ .

| Issue                                    | Potential cause(s)                                                                                                                                                   | Troubleshooting                                                                                                                                                                                                                                                                                 |
|------------------------------------------|----------------------------------------------------------------------------------------------------------------------------------------------------------------------|-------------------------------------------------------------------------------------------------------------------------------------------------------------------------------------------------------------------------------------------------------------------------------------------------|
| <b>Micropatterning</b>                   |                                                                                                                                                                      |                                                                                                                                                                                                                                                                                                 |
| Cannot see illumination from PRIMO laser | <ul style="list-style-type: none"> <li>• Light path is not set up correctly</li> <li>• PRIMO laser is not on or laser is interlocked</li> </ul>                      | <ul style="list-style-type: none"> <li>• Check that the microscope light path is set up properly</li> </ul>                                                                                                                                                                                     |
| Many broken grid squares                 | <ul style="list-style-type: none"> <li>• Touching grid foil with tweezers or pipet while handling</li> <li>• Grid dried out during incubations or washing</li> </ul> | <ul style="list-style-type: none"> <li>• Handle grids with care</li> <li>• Do not allow grid to dry during washes and incubations</li> </ul>                                                                                                                                                    |
| Large unpatterned areas                  | <ul style="list-style-type: none"> <li>• Insufficient gel coverage</li> <li>• Grid foil out of focus during patterning</li> <li>• Area covered by stencil</li> </ul> | <ul style="list-style-type: none"> <li>• Ensure gel spreads evenly over grid while adding</li> <li>• Add an additional microliter of gel</li> <li>• Check focus before patterning each region</li> <li>• Carefully center grid in stencil</li> </ul>                                            |
| Saturated or inverted pattern            | <ul style="list-style-type: none"> <li>• Incorrect dose</li> <li>• Insufficient gel coverage</li> </ul>                                                              | <ul style="list-style-type: none"> <li>• Try a range of total doses for pattern</li> <li>• Ensure grid is evenly covered with gel</li> <li>• Try different values for grayscale patterns</li> </ul>                                                                                             |
| Blurry pattern                           | <ul style="list-style-type: none"> <li>• Poor focus during patterning</li> <li>• Incorrect calibration</li> </ul>                                                    | <ul style="list-style-type: none"> <li>• Repeat PRIMO calibration at same height as sample</li> <li>• Focus on grid foil before patterning</li> <li>• Divide pattern into additional regions for patterning</li> </ul>                                                                          |
| ECM adhering outside of pattern          | <ul style="list-style-type: none"> <li>• Reflections from gel or dust</li> </ul>                                                                                     | <ul style="list-style-type: none"> <li>• Ensure gel is dry before patterning</li> <li>• Make sure coverslip and objective lens are clean</li> </ul>                                                                                                                                             |
| ECM not visible after patterning         | <ul style="list-style-type: none"> <li>• Photo bleaching</li> <li>• Incorrect dose during patterning</li> <li>• Insufficient ECM incubation time</li> </ul>          | <ul style="list-style-type: none"> <li>• Minimize light exposure to ECM prior to imaging</li> <li>• Try a range of total dose values for pattern</li> <li>• Increase incubation time for ECM</li> </ul>                                                                                         |
| <b>Cell seeding</b>                      |                                                                                                                                                                      |                                                                                                                                                                                                                                                                                                 |
| Cells clumping                           | <ul style="list-style-type: none"> <li>• Over digestion</li> <li>• High cell density</li> </ul>                                                                      | <ul style="list-style-type: none"> <li>• Use lower percentage of trypsin or time for release of adherent cells</li> <li>• Passage and/or digest cells at lower confluency</li> <li>• Do not agitate cells during release</li> <li>• Gently pipet cell solution or use cell strainers</li> </ul> |
| Cells not adhering to patterned areas    | <ul style="list-style-type: none"> <li>• ECM is not suitable for cell type</li> <li>• Cells viability is decreased prior to seeding</li> </ul>                       | <ul style="list-style-type: none"> <li>• Try different ECM concentrations and composition</li> <li>• Ensure cell culture and cell release conditions are not damaging cells</li> </ul>                                                                                                          |
| Cells not expanding after adhesion       | <ul style="list-style-type: none"> <li>• ECM or pattern not suitable for cell type</li> </ul>                                                                        | <ul style="list-style-type: none"> <li>• Try different patterns and ECM</li> <li>• In some cases a more continuous foil (R1.2/20 vs R2/1) may promote cell expansion</li> </ul>                                                                                                                 |

898  
899  
900  
901

**Table 1. Potential issues during micropatterning.** This table describes some issues a user may experience during micropatterning or cell-seeding. Potential causes and troubleshooting are provided for each issue. Representative images of some problems can be seen in Figure 8.

902 **ACKNOWLEDGMENTS:**

903 We thank Dr. Jill Wildonger, Dr. Sihui Z. Yang, and Mrs. Josephine W. Mitchell in the  
904 Department of Biochemistry, University of Wisconsin, Madison for kindly sharing the elav-Gal4,  
905 UAS-CD8::GFP fly strain (Bloomington stock center, #5146). We would also like to thank Dr.  
906 Aurélien Duboin, Mr. Laurent Siquier, and Ms. Marie-Charlotte Manus from Alvéole and Mr.  
907 Serge Kaddoura from Nanoscale Labs for their generous support during this project. This work  
908 was supported in part by the University of Wisconsin, Madison, the Department of  
909 Biochemistry at the University of Wisconsin, Madison, and public health service grants R01  
910 GM114561, R01 GM104540, R01 GM104540-03W1, and U24 GM139168 to E.R.W. from the  
911 NIH. A portion of this research was supported by NIH grant U24 GM129547 and performed at  
912 the PNCC at OHSU and accessed through EMSL (grid.436923.9), a DOE Office of Science User  
913 Facility sponsored by the Office of Biological and Environmental Research. We are also grateful  
914 for the use of facilities and instrumentation at the Cryo-EM Research Center in the Department  
915 of Biochemistry at the University of Wisconsin, Madison.

916

917 **DISCLOSURES:**

918

919 The authors have nothing to disclose.

920

921 **REFERENCES**

922

- 923 1 Nogales, E. & Scheres, S. H. Cryo-EM: A Unique Tool for the Visualization of  
924 Macromolecular Complexity. *Mol Cell*. **58** (4), 677-689, (2015).
- 925 2 Martynowycz, M. W. & Gonen, T. From electron crystallography of 2D crystals to  
926 MicroED of 3D crystals. *Curr Opin Colloid Interface Sci*. **34** 9-16, (2018).
- 927 3 Wagner, J., Schaffer, M. & Fernandez-Busnadiego, R. Cryo-electron tomography-the cell  
928 biology that came in from the cold. *FEBS Lett*. **591** (17), 2520-2533, (2017).
- 929 4 Wan, W. & Briggs, J. A. Cryo-Electron Tomography and Subtomogram Averaging.  
930 *Methods Enzymol*. **579** 329-367, (2016).
- 931 5 Bäuerlein, F. J., Pastor-Pareja, J. C. & Fernández-Busnadiego, R. Cryo-electron  
932 tomography of native Drosophila tissues vitrified by plunge freezing. *bioRxiv*. (2021).
- 933 6 Hampton, C. M. *et al*. Correlated fluorescence microscopy and cryo-electron tomography  
934 of virus-infected or transfected mammalian cells. *Nat Protoc*. **12** (1), 150-167, (2017).
- 935 7 Hsieh, C. E., Leith, A., Mannella, C. A., Frank, J. & Marko, M. Towards high-resolution  
936 three-dimensional imaging of native mammalian tissue: electron tomography of frozen-  
937 hydrated rat liver sections. *J Struct Biol*. **153** (1), 1-13, (2006).
- 938 8 Al-Amoudi, A., Norlen, L. P. & Dubochet, J. Cryo-electron microscopy of vitreous  
939 sections of native biological cells and tissues. *J Struct Biol*. **148** (1), 131-135, (2004).
- 940 9 Rigort, A. *et al*. Focused ion beam micromachining of eukaryotic cells for cryoelectron  
941 tomography. *Proc Natl Acad Sci U S A*. **109** (12), 4449-4454, (2012).
- 942 10 Gorelick, S. *et al*. PIE-scope, integrated cryo-correlative light and FIB/SEM microscopy.  
943 *Elife*. **8**, (2019).
- 944 11 Wu, G. H. *et al*. Multi-scale 3D Cryo-Correlative Microscopy for Vitrified Cells.  
945 *Structure*. **28** (11), 1231-1237 e1233, (2020).

- 946 12 Turk, M. & Baumeister, W. The promise and the challenges of cryo-electron  
947 tomography. *FEBS Lett.* **594** (20), 3243-3261, (2020).
- 948 13 Théry, M. Micropatterning as a tool to decipher cell morphogenesis and functions.  
949 *Journal of cell science.* **123** (24), 4201-4213, (2010).
- 950 14 Hardelauf, H. *et al.* Micropatterning neuronal networks. *Analyst.* **139** (13), 3256-3264,  
951 (2014).
- 952 15 Toro-Nahuelpan, M. *et al.* Tailoring cryo-electron microscopy grids by photo-  
953 micropatterning for in-cell structural studies. *Nature Methods.* **17** (1), 50-54, (2020).
- 954 16 Engel, L. *et al.* Extracellular matrix micropatterning technology for whole cell cryogenic  
955 electron microscopy studies. *J Micromech Microeng.* **29** (11), (2019).
- 956 17 Engel, L. *et al.* Lattice micropatterning of electron microscopy grids for improved  
957 cellular cryo-electron tomography throughput. *bioRxiv.* (2020).
- 958 18 Egger, B., van Giesen, L., Moraru, M. & Sprecher, S. G. In vitro imaging of primary  
959 neural cell culture from Drosophila. *Nat Protoc.* **8** (5), 958-965, (2013).
- 960 19 Yang, J. E., Larson, M. R., Sibert, B. S., Shrum, S. & Wright, E. R. CorRelator:  
961 Interactive software for real-time high precision cryo-correlative light and electron  
962 microscopy. *J Struct Biol.* 10.1016/j.jsb.2021.107709 107709, (2021).
- 963 20 Ke, Z. *et al.* The Morphology and Assembly of Respiratory Syncytial Virus Revealed by  
964 Cryo-Electron Tomography. *Viruses.* **10** (8), (2018).
- 965 21 Ke, Z. *et al.* Promotion of virus assembly and organization by the measles virus matrix  
966 protein. *Nat Commun.* **9** (1), 1736, (2018).
- 967 22 Lu, W., Lakonishok, M. & Gelfand, V. I. Kinesin-1-powered microtubule sliding initiates  
968 axonal regeneration in Drosophila cultured neurons. *Mol Biol Cell.* **26** (7), 1296-1307,  
969 (2015).
- 970 23 Kim, J., Yang, S., Wildonger, J. & Wright, E. A New In Situ Neuronal Model for Cryo-  
971 ET. *Microscopy and Microanalysis.* **26** (S2), 130-132, (2020).
- 972 24 Tseng, Q. *et al.* Spatial organization of the extracellular matrix regulates cell-cell junction  
973 positioning. *Proc Natl Acad Sci U S A.* **109** (5), 1506-1511, (2012).
- 974 25 Bouvette, J. *et al.* Beam image-shift accelerated data acquisition for near-atomic  
975 resolution single-particle cryo-electron tomography. *Nat Commun.* **12** (1), 1957, (2021).
- 976 26 Schorb, M., Haberbosch, I., Hagen, W. J. H., Schwab, Y. & Mastronarde, D. N. Software  
977 tools for automated transmission electron microscopy. *Nat Methods.* **16** (6), 471-477,  
978 (2019).
- 979 27 Weis, F., Hagen, W. J. H., Schorb, M. & Mattei, S. Strategies for Optimization of  
980 Cryogenic Electron Tomography Data Acquisition. *J Vis Exp.* 10.3791/62383 (169),  
981 (2021).
- 982 28 Chreifi, G., Chen, S. & Jensen, G. J. Rapid tilt-series method for cryo-electron  
983 tomography: Characterizing stage behavior during FISE acquisition. *J Struct Biol.* **213**  
984 (2), 107716, (2021).
- 985 29 Anderson, D. E. & Hinds, M. T. Endothelial cell micropatterning: methods, effects, and  
986 applications. *Ann Biomed Eng.* **39** (9), 2329-2345, (2011).
- 987 30 McWhorter, F. Y., Wang, T., Nguyen, P., Chung, T. & Liu, W. F. Modulation of  
988 macrophage phenotype by cell shape. *Proc Natl Acad Sci U S A.* **110** (43), 17253-17258,  
989 (2013).
- 990 31 Kleinman, H. K., Luckenbill-Edds, L., Cannon, F. W. & Sephel, G. C. Use of  
991 extracellular matrix components for cell culture. *Anal Biochem.* **166** (1), 1-13, (1987).



- 992 32 Fassler, F., Zens, B., Hauschild, R. & Schur, F. K. M. 3D printed cell culture grid holders  
993 for improved cellular specimen preparation in cryo-electron microscopy. *J Struct Biol.*  
994 **212** (3), 107633, (2020).
- 995 33 Schellenberger, P. *et al.* High-precision correlative fluorescence and electron cryo  
996 microscopy using two independent alignment markers. *Ultramicroscopy.* **143** 41-51,  
997 (2014).
- 998 34 Stobart, C. C. *et al.* A live RSV vaccine with engineered thermostability is immunogenic  
999 in cotton rats despite high attenuation. *Nat Commun.* **7** 13916, (2016).
- 1000 35 Hotard, A. L. *et al.* A stabilized respiratory syncytial virus reverse genetics system  
1001 amenable to recombination-mediated mutagenesis. *Virology.* **434** (1), 129-136, (2012).
- 1002 36 Schindelin, J. *et al.* Fiji: an open-source platform for biological-image analysis. *Nat*  
1003 *Methods.* **9** (7), 676-682, (2012).
- 1004 37 Mastronarde, D. N. Automated electron microscope tomography using robust prediction  
1005 of specimen movements. *J Struct Biol.* **152** (1), 36-51, (2005).
- 1006 38 Kremer, J. R., Mastronarde, D. N. & McIntosh, J. R. Computer visualization of three-  
1007 dimensional image data using IMOD. *J Struct Biol.* **116** (1), 71-76, (1996).
- 1008 39 Tang, G. *et al.* EMAN2: an extensible image processing suite for electron microscopy. *J*  
1009 *Struct Biol.* **157** (1), 38-46, (2007).
- 1010
